# Supplementary material
Source: ML conference proceedings conference paper supplement (https://www.ecva.net/papers/eccv_2020/papers_ECCV/html/123610035_ECCV_2020_paper.php)
Supplement: Supplementary file 2 [file 123610035-supp.zip]

Archive with 5 entries (5 files):
- 2481-supp.pdf
- loss_example.mp4
- model_comparsion_1.mp4
- model_comparsion_2.mp4
- win_example.mp4
